# Supplementary material for: DNA Methyltransferase Inhibitors with Novel Chemical Scaffolds
Source: bioRxiv or medRxiv preprint supplement (doi:10.1101/2020.10.13.337709), 2020-10-14
Supplement: Supplementary file [file media-1.pdf]

# SUPPORTING INFORMATION

## DNA Methyltransferase Inhibitors with Novel Chemical Scaffolds

K. Eurídice Juárez-Mercado<sup>1</sup>, Fernando D. Prieto-Martínez<sup>1</sup>, Norberto Sánchez-Cruz<sup>1</sup>, Andrea Peña-Castillo<sup>1</sup>, Diego Prada-Gracia<sup>2</sup>, José L. Medina-Franco<sup>\*,1</sup>

<sup>1</sup> DIFACQUIM research group, Department of Pharmacy, School of Chemistry, National Autonomous University of Mexico, Avenida Universidad 3000, Mexico City 04510, Mexico

<sup>2</sup> Research Unit on Computational Biology and Drug Design, Children's Hospital of Mexico Federico Gomez, Mexico City, Mexico

\*Corresponding author: medinajl@unam.mx; jose.medina.franco@gmail.com. Tel.: +5255-5622-3899

### Contents

|                                                                                                                                                                                               | Page |
|-----------------------------------------------------------------------------------------------------------------------------------------------------------------------------------------------|------|
| <b>Figure S1</b> Chemical structures of the ten most frequent (Bemis-Murcko) scaffolds of the active DNMT inhibitors available in ChEMBL 27.                                                  | S2   |
| <b>Table S1</b> Chemical vendors of the ten compounds tested and their purity as supplied by the vendor.                                                                                      | S3   |
| <b>Figure S2</b> Comparison of the co-crystal position of SAH in the catalytic site of DNMT1 (PDB ID: 4WXX) with the predicted binding mode of <b>A) CSC027694519</b> and <b>B) 7936171</b> . | S4   |

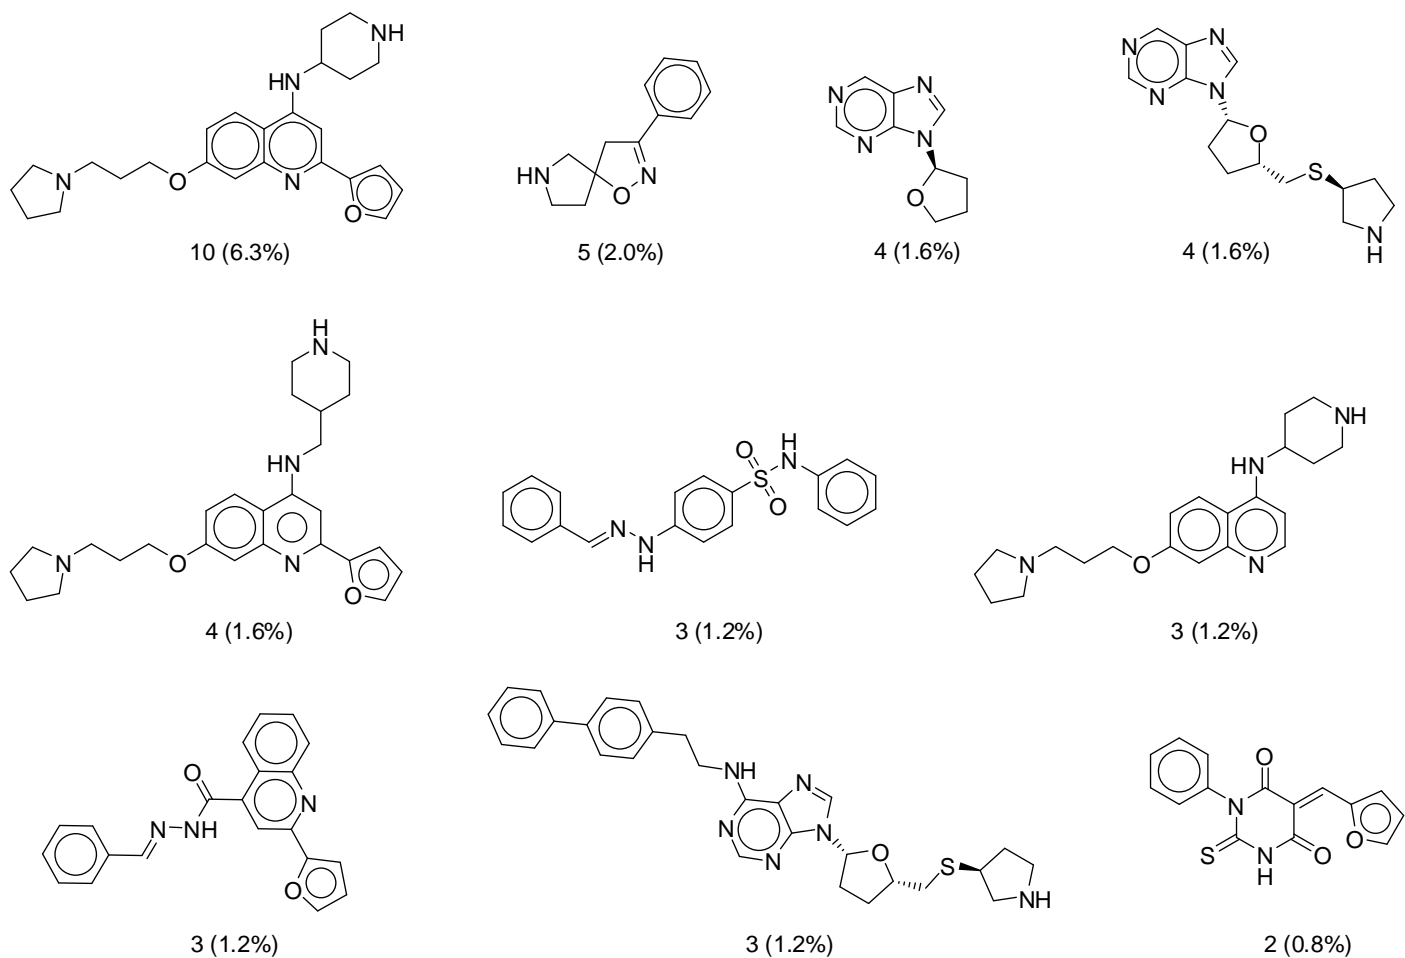

**Figure S1.** Chemical structures of the ten most frequent (Bemis-Murcko) scaffolds of the active DNMT inhibitors available in ChEMBL 27. The percentage of frequency is indicated in parenthesis.

**Table S1.** Chemical vendors of the ten compounds tested and their purity as supplied by the vendor.

| Compound            | Vendor     | Purity % (provided by vendor) |
|---------------------|------------|-------------------------------|
| Glyburide           | TargetMol  | 99.77                         |
| Panobinostat        | TargetMol  | 98                            |
| Theaflavin          | TargetMol  | 97.76                         |
| <b>7936171</b>      | Chembridge | $\geq 90$                     |
| <b>CSC027480404</b> | ChemSpace  | 90                            |
| <b>CSC026286840</b> | ChemSpace  | 100                           |
| <b>CSC027694519</b> | ChemSpace  | 100                           |
| <b>6631802</b>      | Chembridge | $\geq 90$                     |
| <b>CSC027796832</b> | ChemSpace  | 94                            |
| <b>CSC027083851</b> | ChemSpace  | 100                           |

**A**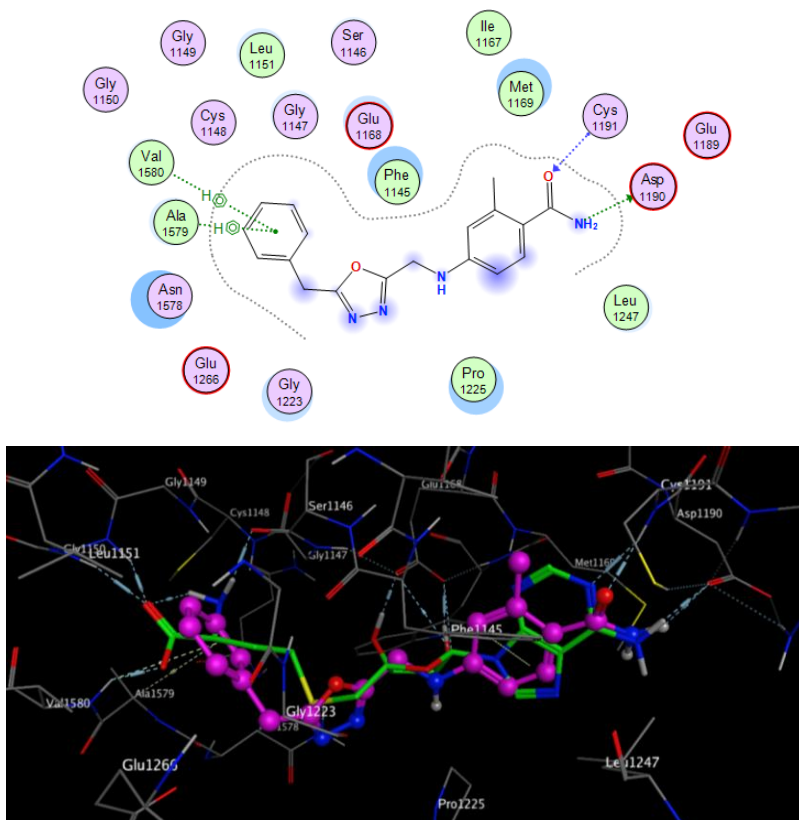**B**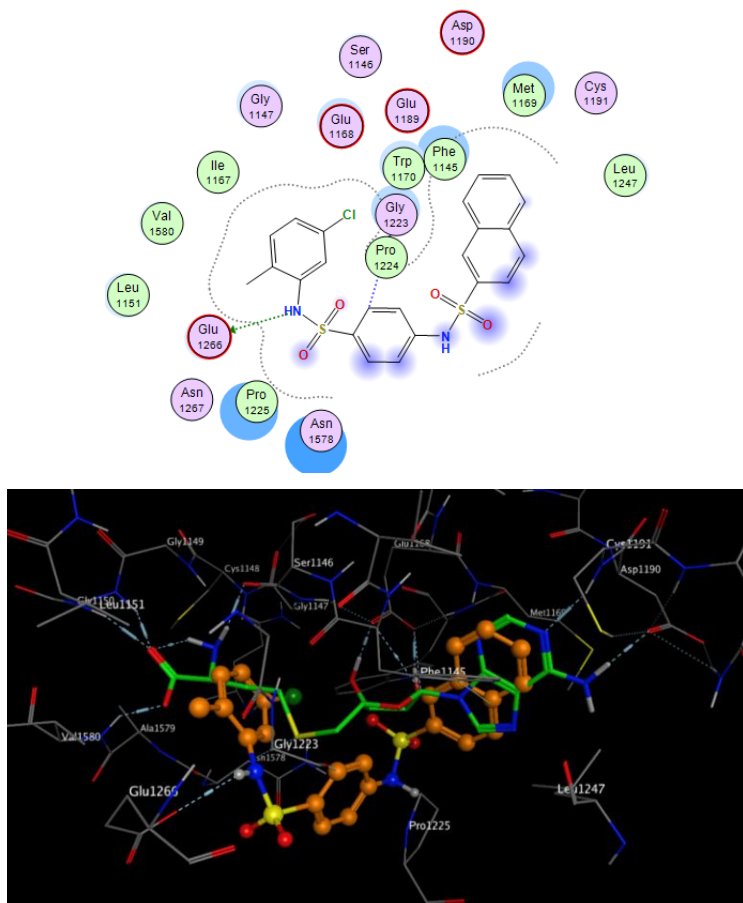

**Figure S2.** Comparison of the co-crystal position of SAH in the catalytic site of DNMT1 (PDB ID: 4WXX) with the predicted binding mode of **A) CSC027694519** and **B) 7936171**.
